# Supplementary material for: Mechanism of sodium channel block by local anesthetics, antiarrhythmics, and anticonvulsants
Source: PubMed Central journal article supplement — J Gen Physiol. 2017 Apr 3;149(4):465–81. doi: 10.1085/jgp.201611668 (PMC5379917; doi:10.1085/jgp.201611668), 2017-04-03
Supplement: JGP_201611668_TableS1.pdf [file JGP_201611668_TableS1.pdf]

**Table S1. Aligned sequences of L45, S5, P-loop, and S6 segments in P-loop channels**

| Channel            | L45-S5 | k1         | k11        | o1         | o11         | o21      | Sequence identity/similarity (%) |         |         |         |
|--------------------|--------|------------|------------|------------|-------------|----------|----------------------------------|---------|---------|---------|
|                    |        |            |            |            |             |          | Kv1.2                            | NavAb   | NavMs   | NavRh   |
| K <sub>v</sub> 1.2 |        | SKGLQILGQT | LK         | ASMRELGLLI | FFLFIGVILF  | SSAVYFAE |                                  |         |         |         |
| NavAb              |        | VPQMRKIVSA | LI         | SVIPGMLSVI | ALMTLFFYIF  | AIMATQLF | 8 / 28                           |         |         |         |
| NavMs              |        | IPTMRRVVQG | ML         | LALPGVGSVA | ALLTVVFYIA  | AVMATNLY | 8 / 35                           | 48 / 80 |         |         |
| NavRh              |        | IPELKQIIEA | IL         | ESVRRVFFVS | LLLFIIILYIY | ATMGAILF | 15 / 48                          | 28 / 55 | 30 / 58 |         |
| Nav1.4             | I      | IPGLKTIVGA | LI         | QSVKLLSDVM | ILTVFCLSVF  | ALVGLQLF | 15 / 38                          | 32 / 50 | 18 / 48 | 38 / 66 |
|                    | II     | WPTLNMLIKI | IG         | NSVGALGNLT | LVLAIIVFIF  | AVVGMQLF | 25 / 45                          | 18 / 55 | 20 / 60 | 38 / 66 |
|                    | III    | FEGMRVVVNA | LL         | GAIPSIMNVL | LVCLIFWLIF  | SIMGVNLF | 13 / 43                          | 38 / 65 | 30 / 62 | 25 / 50 |
|                    | IV     | AKGIRTLFFA | LM         | MSLPALFNIG | LLLFLVMFIY  | SIFGMSNF | 22 / 45                          | 22 / 50 | 18 / 52 | 28 / 58 |
| Cav1.2             | I      | VPSLQVVLNS | II         | KAMVPLHIA  | LLVLFVIIY   | AIIGLELF | 12 / 55                          | 25 / 50 | 22 / 58 | 28 / 55 |
|                    | II     | WNSLSNLVAS | LL         | NSVRSIASLL | LLLFLFIIIF  | SLLGMQLF | 28 / 55                          | 28 / 50 | 18 / 50 | 32 / 58 |
|                    | III    | AKGLKHVVQC | VF         | VAIRTIGNIV | IVTTLQFMF   | ACIGVQLF | 18 / 48                          | 22 / 55 | 20 / 60 | 18 / 55 |
|                    | IV     | GEGIRTLWT  | FI         | KSFQALPYVA | LLIVMLFFIY  | AVIGMQVF | 12 / 40                          | 22 / 50 | 20 / 55 | 22 / 56 |
|                    | P-loop | p38        | p41        | p51        | p60         |          |                                  |         |         |         |
| K <sub>v</sub> 1.2 |        | DAF        | WWAVVSMTTV | GYGDMVPTT  | ---         |          |                                  |         |         |         |
| NavAb              |        | ESF        | YTLFQVMTLE | SWSMGIVRP  | LME         | 12 / 32  |                                  |         |         |         |
| NavMs              |        | ISL        | YTLFQVMTLE | SWSMGIVRP  | VMN         | 8 / 24   | 84 / 92                          |         |         |         |
| NavRh              |        | ISL        | ITLFQVLTLS | SWETVML-P  | MQE         | 4 / 12   | 48 / 60                          | 52 / 68 |         |         |
| Nav1.4             | I      | WAF        | LALFRLMTQD | YW-ENLFQL  | TLR         | 16 / 32  | 24 / 40                          | 20 / 32 | 16 / 32 |         |
|                    | II     | HSF        | LIVFRILCGE | -WIETMWDC  | MEV         | 4 / 24   | 20 / 36                          | 16 / 32 | 24 / 52 |         |
|                    | III    | LGY        | LSSLQVATFK | GW-MDIMYA  | AVD         | 8 / 36   | 28 / 48                          | 28 / 48 | 20 / 48 |         |
|                    | IV     | NSI        | ICLFEITTS  | GW-DGLLNP  | ILN         | 12 / 40  | 28 / 56                          | 32 / 60 | 32 / 60 |         |
| Cav1.2             | I      | FAM        | LTVFQCITME | GWTDVLYWM  | QDA         | 16 / 28  | 24 / 40                          | 24 / 40 | 24 / 44 |         |
|                    | II     | QSL        | LTVFQILTGE | DWNSVMYDG  | IMA         | 4 / 16   | 32 / 56                          | 36 / 56 | 40 / 68 |         |
|                    | III    | AAM        | MALFTVSTFE | GWPELLYRS  | IDS         | 12 / 32  | 28 / 40                          | 28 / 44 | 20 / 36 |         |
|                    | IV     | QAV        | LLLFRCATGE | AWQDIMLAC  | MPG         | 12 / 28  | 20 / 36                          | 20 / 36 | 28 / 56 |         |

| Channel | S6  | i2<br>    | i11<br>     | i21<br>    | Sequence identity/similarity (%) |         |         |         |
|---------|-----|-----------|-------------|------------|----------------------------------|---------|---------|---------|
|         |     |           |             |            | Kv1.2                            | NavAb   | NavMs   | NavRh   |
| Kv1.2   |     | GGKIVGSLC | AIAGVLTIAL  | PVPVIVSNFN |                                  |         |         |         |
| NavAb   |     | YAWVFFIPF | IFVVTFFVMIN | LVVAICVDAM | 7 / 34                           |         |         |         |
| NavMs   |     | NAWVFFIPF | IMLTTFITVLN | LFIGIIVDAM | 7 / 38                           | 62 / 76 |         |         |
| NavRh   |     | WSWVYFFSF | IIICSITILN  | LVIAILVDV  | 17 / 44                          | 41 / 66 | 45 / 69 |         |
| Nav1.4  | I   | TYMIFVVI  | IFLGSFYLIN  | LILAVVAMAY | 10 / 38                          | 34 / 66 | 28 / 62 | 21 / 59 |
|         | II  | MCLTVFLMV | MVIGNLVVLN  | LFLALLLSSF | 10 / 34                          | 17 / 41 | 21 / 45 | 24 / 45 |
|         | III | YMYLYFVIF | IIFGSFFTLN  | LFIGVIIDNF | 7 / 34                           | 28 / 66 | 41 / 66 | 38 / 62 |
|         | IV  | IGICFFCSY | IIISFLIVVN  | MYIAIILENF | 14 / 41                          | 21 / 48 | 28 / 59 | 31 / 59 |
| Cav1.2  | I   | IPWVYFVSL | VIFGSFFVLN  | LVLGVLSGEF | 14 / 41                          | 24 / 55 | 31 / 55 | 41 / 59 |
|         | II  | LVCIFYFIL | FISPNYILLN  | LFLAIADDNL | 10 / 38                          | 24 / 48 | 28 / 55 | 31 / 48 |
|         | III | EISIFFIIY | IIIIAFFMMN  | IFVGFVIVTF | 10 / 34                          | 28 / 55 | 28 / 59 | 17 / 45 |
|         | IV  | FAVFYFISF | YMLCAFLIIN  | LFVAVIMDNF | 3 / 31                           | 38 / 55 | 41 / 62 | 34 / 55 |

Highlighted are small-size residues in positions *o21* and *o23* of S5 helices (Tikhonov et al. 2015. *Pflugers Arch.* 467:253–266), conserved tryptophans in positions *p52* of P-loops (Tikhonov and Zhorov. 2012. *Mol. Pharmacol.* 82:97–104) and conserved asparagines in positions *i20* of S6 helices (Tikhonov et al. 2015. *Pflugers Arch.* 467:253–266).

Sequence identities and similarities were calculated using server “[http://www.bioinformatics.org/sms2/ident\\_sim.html](http://www.bioinformatics.org/sms2/ident_sim.html)” and the following groups of similar residues: GAVLI, FYW, CM, ST, KRH, DENQ, P
